# Supplementary material for: Visual Outcomes After Bilateral Implantation of AcrySof™ IQ Vivity™ Extended Vision Intraocular Lens
Source: Research Square preprint supplement (doi:10.21203/rs.3.rs-1319041/v1), 2022-03-16
Supplement: Supplementary file 1 [file 9631d13a84f3445873736e9b.docx]

**Supplementary Table 1.** Postoperative visual disturbances of study participants assessed by the Quality of Vision Questionnaire.

| **Visual disturbances** | **Frequency** | | | | **Severity** | | | | **Bothersome** | | | | |
| --- | --- | --- | --- | --- | --- | --- | --- | --- | --- | --- | --- | --- | --- |
| N = 20 | Never  n (%) | Occasionally  n (%) | Quite often  n (%) | Very often  n (%) | Not at all  n (%) | Mild  n (%) | Moderate  n (%) | Severe  n (%) | Not at all  n (%) | A little  n (%) | Quite  n (%) | Very  n (%) |
| Glare | 17 (85) | 3 (15) | 0 (0) | 0 (0) | 17 (85) | 3 (15) | 0 (0) | 0 (0) | 17 (85) | 3 (15) | 0 (0) | 0 (0) |
| Haloes | 17 (85) | 3 (15) | 0 (0) | 0 (0) | 17 (85) | 2 (10) | 1 (5) | 0 (0) | 17 (85) | 2 (10) | 1 (5) | 0 (0) |
| Starbursts | 20 (100) | 0 (0) | 0 (0) | 0 (0) | 20 (100) | 0 (0) | 0 (0) | 0 (0) | 20 (100) | 0 (0) | 0 (0) | 0 (0) |
| Hazy vision | 20 (100) | 0 (0) | 0 (0) | 0 (0) | 20 (100) | 0 (0) | 0 (0) | 0 (0) | 20 (100) | 0 (0) | 0 (0) | 0 (0) |
| Blurred vision | 17 (85) | 3 (15) | 0 (0) | 0 (0) | 17 (85) | 3 (15) | 0 (0) | 0 (0) | 17 (85) | 3 (15) | 0 (0) | 0 (0) |
| Distortion | 20 (100) | 0 (0) | 0 (0) | 0 (0) | 20 (100) | 0 (0) | 0 (0) | 0 (0) | 20 (100) | 0 (0) | 0 (0) | 0 (0) |
| Double vision | 20 (100) | 0 (0) | 0 (0) | 0 (0) | 20 (100) | 0 (0) | 0 (0) | 0 (0) | 20 (100) | 0 (0) | 0 (0) | 0 (0) |
| Fluctuation | 20 (100) | 0 (0) | 0 (0) | 0 (0) | 20 (100) | 0 (0) | 0 (0) | 0 (0) | 20 (100) | 0 (0) | 0 (0) | 0 (0) |
| Focusing difficulties | 19 (95) | 1 (5) | 0 (0) | 0 (0) | 19 (95) | 1 (5) | 0 (0) | 0 (0) | 19 (95) | 1 (5) | 0 (0) | 0 (0) |
| Depth perception difficulty | 18 (90) | 2 (10) | 0 (0) | 0 (0) | 18 (90) | 1 (5) | 1 (5) | 0 (0) | 18 (90) | 2 (10) | 0 (0) | 0 (0) |
